# Supplementary material
Source: PubMed Central journal article supplement (PMC10364077)
Supplement: NIHMS1914508-supplement-Supinfo.pdf [file NIHMS1914508-supplement-Supinfo.pdf]

**Supplementary Material**  
**K-H Lin et al.**

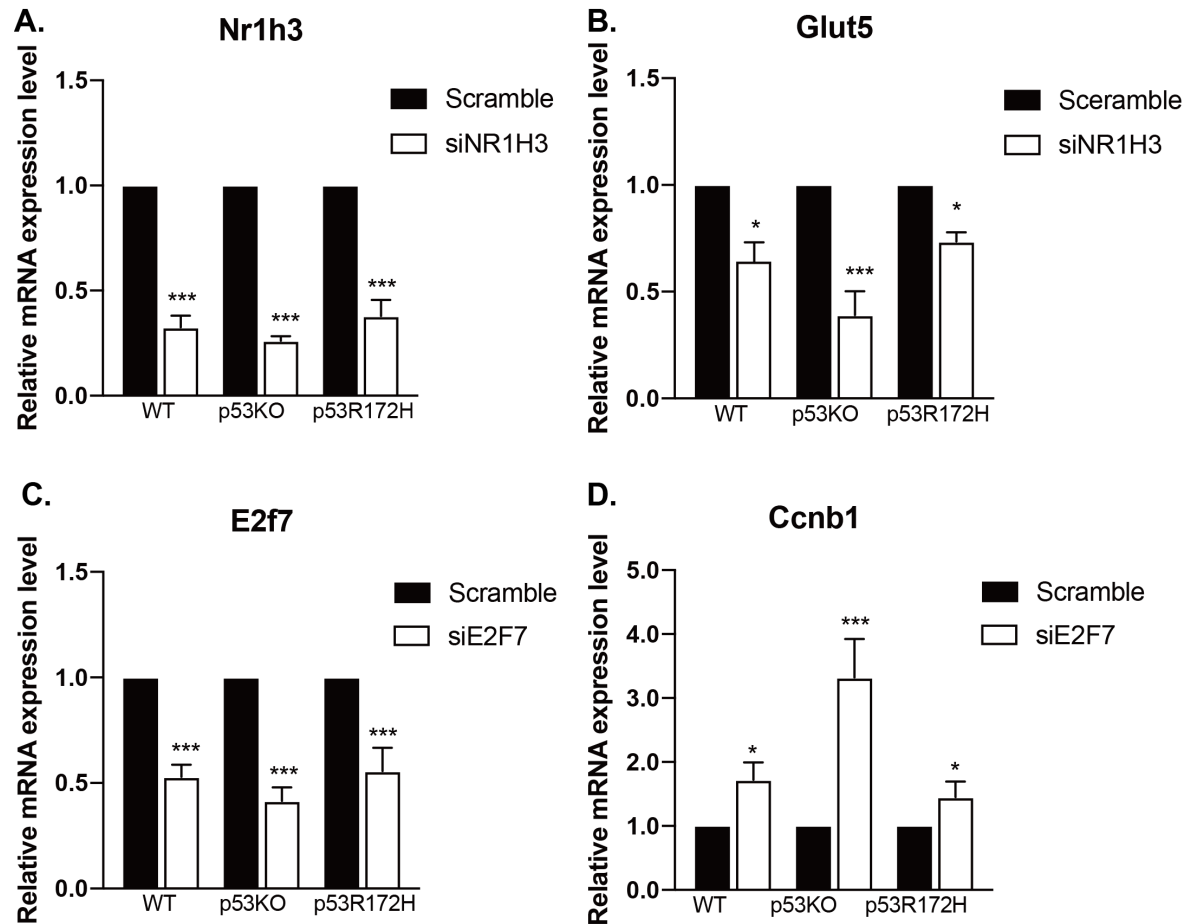

**Supplementary Figure 1. KD efficiency of siRNA targeting NR1H3 and E2F7 in MEF cells.** The mRNA expression level of (A) NR1H3, (B) GLUT5, (C) E2F7, and (D) CCNB1 was measured using RT-qPCR. 100 nM of NR1H3 siRNA and 150 nM of E2F7 siRNA was transfected in WT, p53-KO, p53<sup>R172H</sup> MEF cells. Total RNA was extracted and reverse transcribed to cDNA. Fold changes in mRNA ( $\Delta\Delta C_t$ ) were calculated and the data represent the mean  $\pm$  SD of three independent experiments. \*p < 0.05 and \*\*\*p < 0.001 indicate significant differences between scramble and siRNA transfected cells.

**A.**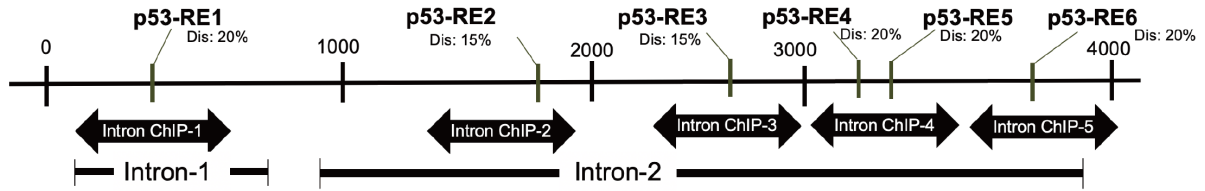**B.**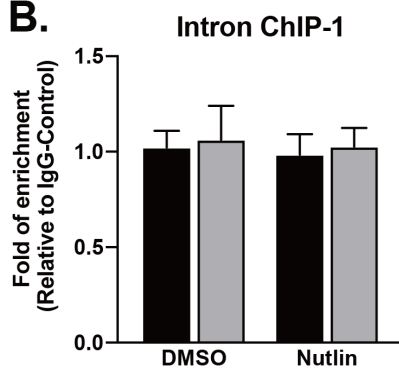**C.**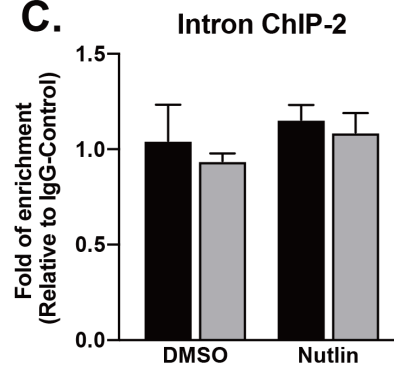**D.**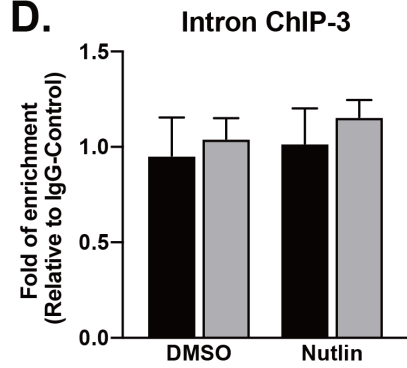**E.**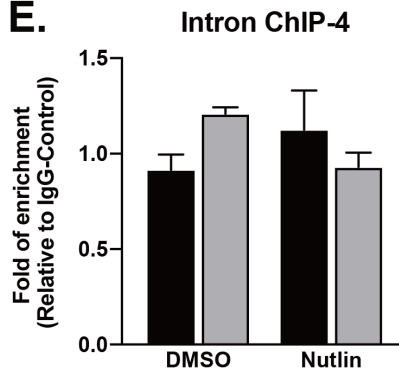**F.**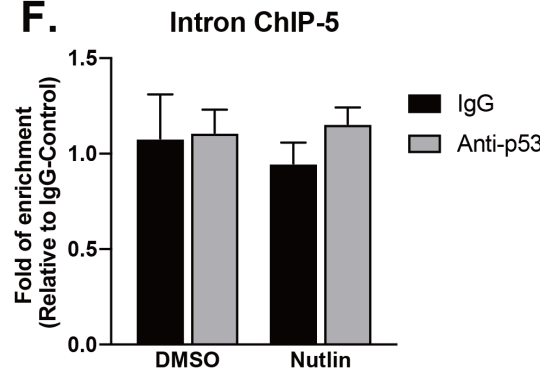

**Supplementary Figure 2. p53 does not bind to intronic p53-RE in human ENPP2.** Human WT HCT116 cells were starved in serum-free medium for 2 h followed by incubation with 20  $\mu$ M Nutlin-3A for 24 h. Cells were further subjected to ChIP-qPCR analysis using anti-p53 or non-specific control IgG antibodies. The primers targeting (A) p53-RE1, (B) p53-RE2, (C) p53-RE3, (E) p53-RE4 & p53-RE5, and (F) p53-RE6 in the second intron were used to quantify the p53-bound DNA. Enrichment of p53-binding was normalized to non-specific control IgG. Analyses represent the mean of three independent experiments. One-way ANOVA was performed to compare the data from multiple experiments to determine the significance of p53 binding at a given site.

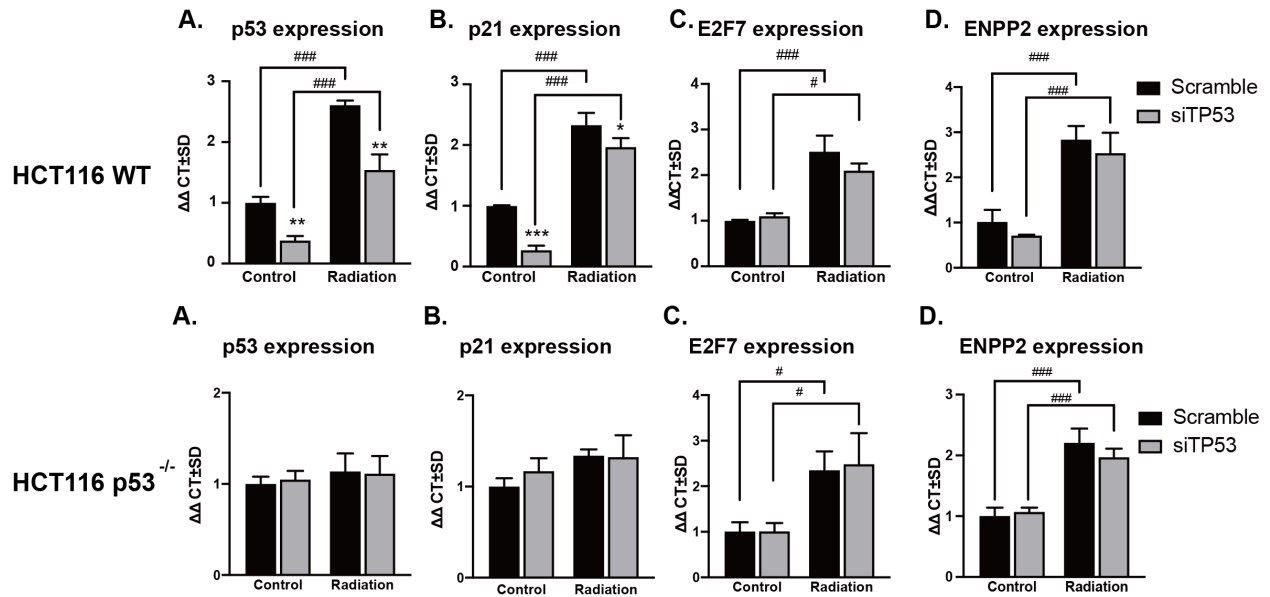

**Supplementary Figure 3.** Human HCT116 WT and HCT116 p53<sup>-/-</sup> cells were transfected with 150 nM TP53 siRNA for 24 h. TP53-KD cells were irradiated at 15 Gy and incubated for 24 h. Total RNA was extracted and 500 ng of total RNA was used for reverse transcription using random primers. mRNA expression of (A & E) p53, (B & F) p21, (C & G) E2F7, and (D & G) ENPP2 were detected by RT-qPCR. Fold changes in mRNA ( $\Delta\Delta Ct$ ) were calculated and the data represent the mean  $\pm$  SD of three independent experiments. \*#p<0.05, \*\* ####p<0.01, and \*\*\*, ####p < 0.001 indicate significant differences between scramble and siTP53 transfected cells. # indicates the comparison between control and radiation.

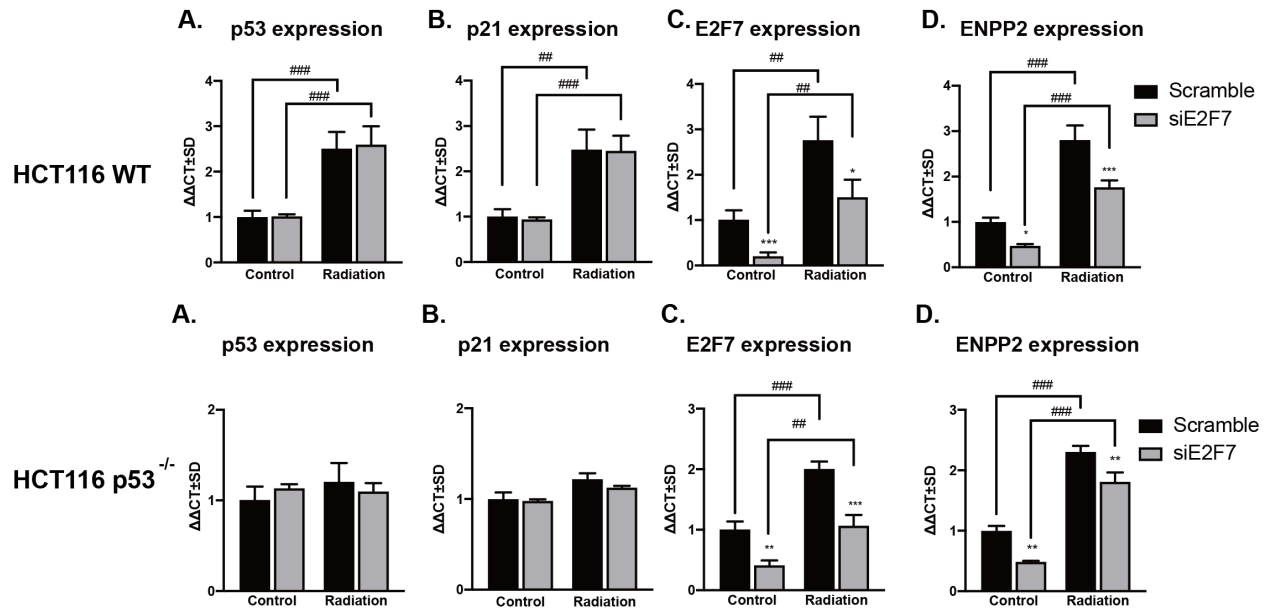

**Supplementary Figure 4.** Human HCT116 WT and HCT116 p53<sup>-/-</sup> cells were transfected with 150 nM E2F7 siRNA for 24 h. E2F7-KD cells were irradiated at 15 Gy and incubated for 24 h. Total RNA was extracted and 500 ng of total RNA was used for reverse transcription using random primers. mRNA expression of (A & E) p53, (B & F) p21, (C & G) E2F7, and (D & G) ENPP2 were detected by RT-qPCR. Fold changes in mRNA ( $\Delta\Delta C_t$ ) were calculated and the data represent the mean  $\pm$  SD of three independent experiments. \*#p<0.05, \*\*###p<0.01, and \*\*\* ,###p < 0.001 indicate significant differences between scramble and siE2F7 transfected cells. # indicates the comparison between control (non-irradiated) versus irradiated cells.

Supplementary table 1. Primers for cloning

| Primer name                                  | sequence                                   |
|----------------------------------------------|--------------------------------------------|
| Full promoter to Dual luciferase vector-F    | GTTTTTCGAACCTAGGATTTGCATCTCGAGATGGAAT      |
| Full promoter to Dual luciferase vector-R    | TGGCTGCTAGCCTAGGCTGAGGGCTGAGGCATT          |
| Partial promoter to Dual luciferase vector-F | GTTTTTCGAACCTAGGATCTTCAGTTTCTGAGCTGTATT    |
| Partial promoter to Dual luciferase vector-R | TGGCTGCTAGCCTAGGCCGAGGGATTCTTGAAAAACC      |
| E2F7 to pEYFP-C1-F                           | CGAGCTCAAGCTTCGAAAGAGGTGAATTGTTTAACTAAAA   |
| E2F7 to pEYFP-C1-R                           | CTGGACTAGTGGATC TACGATTCATCTGCAGC          |
| E2F7-R185A-F                                 | GGAAAGGAGAGCCATCTATGACATCGTAAACGTGCTGGAGTC |
| E2F7-R185A-R                                 | ACGCCGAGACTGACGGCG                         |
| E2F7-R334A-F                                 | AAAGGTACGGGCCCTCTATGACATAG                 |
| E2F7-R334A-R                                 | GTTTTGAATTTGCTGTGGTCCGGGG                  |
| E2F7-DD-del-1-F                              | TCGCTGCATCTGGTCAGC                         |
| E2F7-DD-del-1-R                              | TACGATGTCATAGATGCGTCTCCTTT                 |
| E2F7-DD-del-2-F                              | ACCAGCCTGGCTCTGATA                         |
| E2F7-DD-del-2-R                              | GGCTATGTCATAGAGCCTCCG                      |
| ATX promoter-E2F7RE-1-del-F                  | ACGCCGAGACTGACGGCG                         |
| ATX promoter E2F7RE-1-del-R                  | AAAGGTACGGGCCCTCTATGACATAG                 |
| ATX promoter E2F7RE-2-del-F                  | ACGCCGAGACTGACGGCG                         |
| ATX promoter E2F7RE-2-del-R                  | AAAGGTACGGGCCCTCTATGACATAG                 |
| ATX promoter-p53RE-del-F                     | GGGTTGTTAGGGTCATCTG                        |
| ATX promoter-p53RE-del-R                     | TCGGAAAGGCATTCTCAG                         |
| Bach2 to pGADT7-F                            | GCATGTCTGTGGATGAGAAGC                      |
| Bach2 to pGADT7-R                            | GGCAGAAGAACACCCAGATGA                      |
| Cebp $\beta$ to pGADT7-F                     | ACTACGGTTACGTGAGCCTC                       |
| Cebp $\beta$ to pGADT7-R                     | TTGCATCAAGTCCCGAAACC                       |
| Fos to pGADT7-F                              | CCCAAACCTTCGACCATGATG                      |
| Fos to pGADT7-R                              | CTCCTCTCTGTAATGCACCA                       |
| Nr1h3 to pGADT7-F                            | AATGTCCAGGGCTCCAGGAA                       |
| Nr1h3to pGADT7-R                             | AGCAGTCAGTGAGCCTTCGC                       |
| E2F7 to pGADT7-F                             | CGACAATGGAGGTGAATTGTTTAAAC                 |
| E2F7 to pGADT7-R                             | TAGATGACTCATGATATCGGGAAGT                  |
| ATX promoter to pABAi-F                      | AAGGTACC TGGCTTTTGTGCTATCGGGT              |
| ATX promoter to pABAi-R                      | AAAGTCGAC ACTGTGTGGTGCCCTAAAAC             |

Supplementary table 2. siRNA sequence

| Target gene         | sequence            |
|---------------------|---------------------|
| mNr1h3 J-040649-09  | GGGAUCUACUAACGUUGUA |
| mNr1h3 J-040649-10  | GCUCAAGCCACUUCGGUGU |
| mNr1h3 J-040649-11  | GAGAGAGCCUUGCGUAGCA |
| mNr1h3 J-040649-12  | CGUCCACAAAAGCGGAAAA |
| mE2f7 J-054889-25   | CCACCUACUUGGAACGCUA |
| mE2f7 J-054889-26   | GAUAAAGAAAGUUCACGUA |
| mE2f7 J-054889-27   | GCAUCUAUGACAUCGUAAA |
| mE2f7 J-054889-28   | GGGUAAGUGUCGGCGAUAU |
| hE2F7 J-026897-05   | GCACACAUCGUGAGACGUU |
| hE2F7 J-026897-06   | UGACUAACCUGCCGCUUUG |
| hE2F7 J-026897-07   | CAAGGACGAUGCAUUUACA |
| hE2F7 J-026897-08   | GCACUAUCCGACCCAUUG  |
| Non-targeting siRNA | UGGUUUACAUGUCGACUAA |

Supplementary table 3. Primers for qPCR and ChIP-qPCR

| Primer name       | sequence                  |
|-------------------|---------------------------|
| mE2F7-F           | TCCGAAGCCGACTACCCCTCTT    |
| mE2F7-R           | TTTGGCAGCTACATCCAGGGTG    |
| mNr1h3-F          | TGGACACCTACATGCGGCGGAA    |
| mNr1h3-R          | CACCGAAGTGGCTTGAGCCTGT    |
| mCcnb1-F          | AAAGGGAAGCAAAAACGCTAGG    |
| mCcnb1-R          | TGTTCAAGTTCAGGTTTCAGGCTC  |
| mGLUT5-F          | CGAAAAACCTACGAGGGGCT      |
| mGLUT5-R          | CTGGCCAGCCATCCTCATT       |
| mChIP-1-F         | ACACTGAAATAACAGTGCAG      |
| mChIP-1-R         | GAGATGCAAATCTGCTGTTC      |
| mChIP-2-F         | ATCAGTTTAGCTTGGCATAAC     |
| mChIP-2-R         | CTCTTAGCTTTGGACTCTCG      |
| mChIP-3-F         | CTATCGGGTTTTATGCGAGC      |
| mChIP-3-R         | TTCAAATGAGGGGAGGCTTG      |
| mChIP-4-F         | TTAAGCTGGCAGCCCCAGTA      |
| mChIP-4-R         | CCAAAATTGCAACTCACACG      |
| mChIP-5-F         | ATACAGGGTCATTCCAACCTG     |
| mChIP-5-R         | AGTTATTTGATGCCCTCAAC      |
| mChIP-6-F         | ACGCTTCGAGCTGATGGGAA      |
| mChIP-6-R         | TTCTTGTGTAGCTGTGGCCA      |
| mChIP-7-F         | GGTCTTAAGCAATGGCTTGG      |
| mChIP-7-R         | TTGGTGTTTCTCTGTGTTTC      |
| m-intron-ChIP-1-F | AAATGAGGCATAGTGAATA       |
| m-intron-ChIP-1-R | TCTGTTTTACATTTCTTCT       |
| m-intron-ChIP-2-F | AGGAACCAATTTTCTGCTTT      |
| m-intron-ChIP-2-R | TGAGGCATTACAAGTGAATT      |
| hChIP-1-F         | GAGTTAACATCTTTTATAAG      |
| hChIP-1-R         | AAAAGAAAATACACATACTG      |
| hChIP-2-F         | CACTACTCTGTACTAATTT       |
| hChIP-2-R         | GAAAAAGATTTGTTTTGGC       |
| hChIP-3-F         | AGTGTGCTGGTTGCCAAATT      |
| hChIP-3-R         | GCTTTATTAGCAATTGAATT      |
| hChIP-4-F         | TCCGCCCCGCCCGAAACAAG      |
| hChIP-4-R         | AGATAACATTATTTTCCCA       |
| hChIP-5-F         | TGGAAAGCCCTTGACACAGCC     |
| hChIP-5-R         | AACAGGAGGGTTTGTACAT       |
| hChIP-6-F         | TAGGGGAGGGACCTGTAAGG      |
| hChIP-6-R         | GGGTTTAGTCTATTAACAT       |
| hChIP-7-F         | TTCTGACCATTAGAAAAGCC      |
| hChIP-7-R         | CCTTTGTGTTTCTTCTATTT      |
| h-intron-ChIP-1-F | AGTCGTGTCAGGTGGGAGAA      |
| h-intron-ChIP-1-R | TACACAAAGGTGATTCAAATGGCTT |
| h-intron-ChIP-2-F | AGTCATTAATAATCCTAGGCT     |
| h-intron-ChIP-2-R | TCAAGAGGCAATGAAACAGA      |
| h-intron-ChIP-3-F | AACAATAGCTGAGAATGTTT      |
| h-intron-ChIP-3-R | TTATGACAGTCTGTTTGCAC      |
| h-intron-ChIP-4-F | ACTTATAATTCTGTTGGGTA      |
| h-intron-ChIP-4-R | TAAATCACAGTTATGGCTTA      |
| h-intron-ChIP-5-F | ATCTTTTTCTCATATGTCTG      |
| h-intron-ChIP-5-R | TGCATAACACCACAAACATA      |
| hp21-F            | AGGTGGACCTGGAGACTCTCAG    |
| hp21-R            | TCCTCTTGGAGAAGATCAGCCG    |

|           |                         |
|-----------|-------------------------|
| mp21-F    | TCGCTGTCTTGCACTCTGGTGT  |
| mp21-R    | CCAATCTGCGCTTGGAGTGATAG |
| hE2F7-F   | TCTGAACCCGACTGTCCCTCTT  |
| hE2F7-R   | TTTGGCAGCCACATCCAGAGTG  |
| hENPP2-F  | TATGCTGCGGAAACTCGTCAGG  |
| hENPP2-R  | GACGTTGACACACCGATGCAGT  |
| hmGAPDH-F | CTGCACCACCAACTGCTTAG    |
| hmGAPDH-R | GGGCCATCCACAGTCTTCT     |



Supplementary table 4. Primers for 3C-qPCR

| Primer name | sequence              |
|-------------|-----------------------|
| mPrimer#1   | AGTTTCTGAGCTGTATTTTT  |
| mPrimer#2   | TACACTGAAATAACAGTGCA  |
| mPrimer#3   | AAGAGGCTTGTAGATAAATT  |
| mPrimer#4   | TCTCTTCTTCTTTTCAATGA  |
| mPrimer#5   | TTTTGTGCTATCGGGTTTTA  |
| mPrimer#6   | GGGGCCCGGTAGGGGAAAGC  |
| mPrimer#7   | TACTGTCCTTTATGCCTGCG  |
| mAnchor-1   | CAAACACAACCTAGATTAGAT |
| mAnchor-2   | ACACAGAGAAACACCAAATT  |
| hPrimer#1   | TGTTTTTGTGTTTTAGAACAT |
| hPrimer#2   | TCTCGTATTTGTTTACGCAC  |
| hPrimer#3   | AAACAATTCTTGACATTTCA  |
| hPrimer#4   | GACTGAAGTTATTTTGTCCG  |
| hPrimer#5   | GTATTTTGATAAAAAGTTACT |
| hPrimer#6   | ACTGCCAGCAAATAAATAG   |
| hPrimer#7   | TTCTTTTTGACAAACCATGT  |
| hAnchor-H   | ATATCAATACCCTTTGTGTT  |
